# Supplementary material for: Effects of the ACA on Health Care Coverage for Adults With Substance Use Disorders
Source: Atypon-hosted journal article supplement (doi:10.1176/appi.ps.202000377), 2021-05-07
Supplement: appi.ps.202000377.ds001.pdf [file appi.ps.202000377.ds001.pdf]

## Appendix Table 1: ACA expansion and nonexpansion states<sup>A</sup>

### Expansion States

AZ, AR, CA, CO, CT, DE, HI, IL, IA, KY,  
MD, MA, MI, MN, NH, NV, NJ, NM, NY,  
ND, OH, OR, RI, VT, WA, WV, DC

### Nonexpansion States

AL, AK, FL, GA, IN, ID, KS, LA, ME, MS,  
MO, MT, NE, NC, OK, PA, SC, SD, TN,  
TX, UT, VA, WI, WY

<sup>A</sup>Based on reference 18.

Appendix Figure 1: Trends in employer-based private insurance among low- and middle-income adults with and without selected substance use disorders, 2012-2018

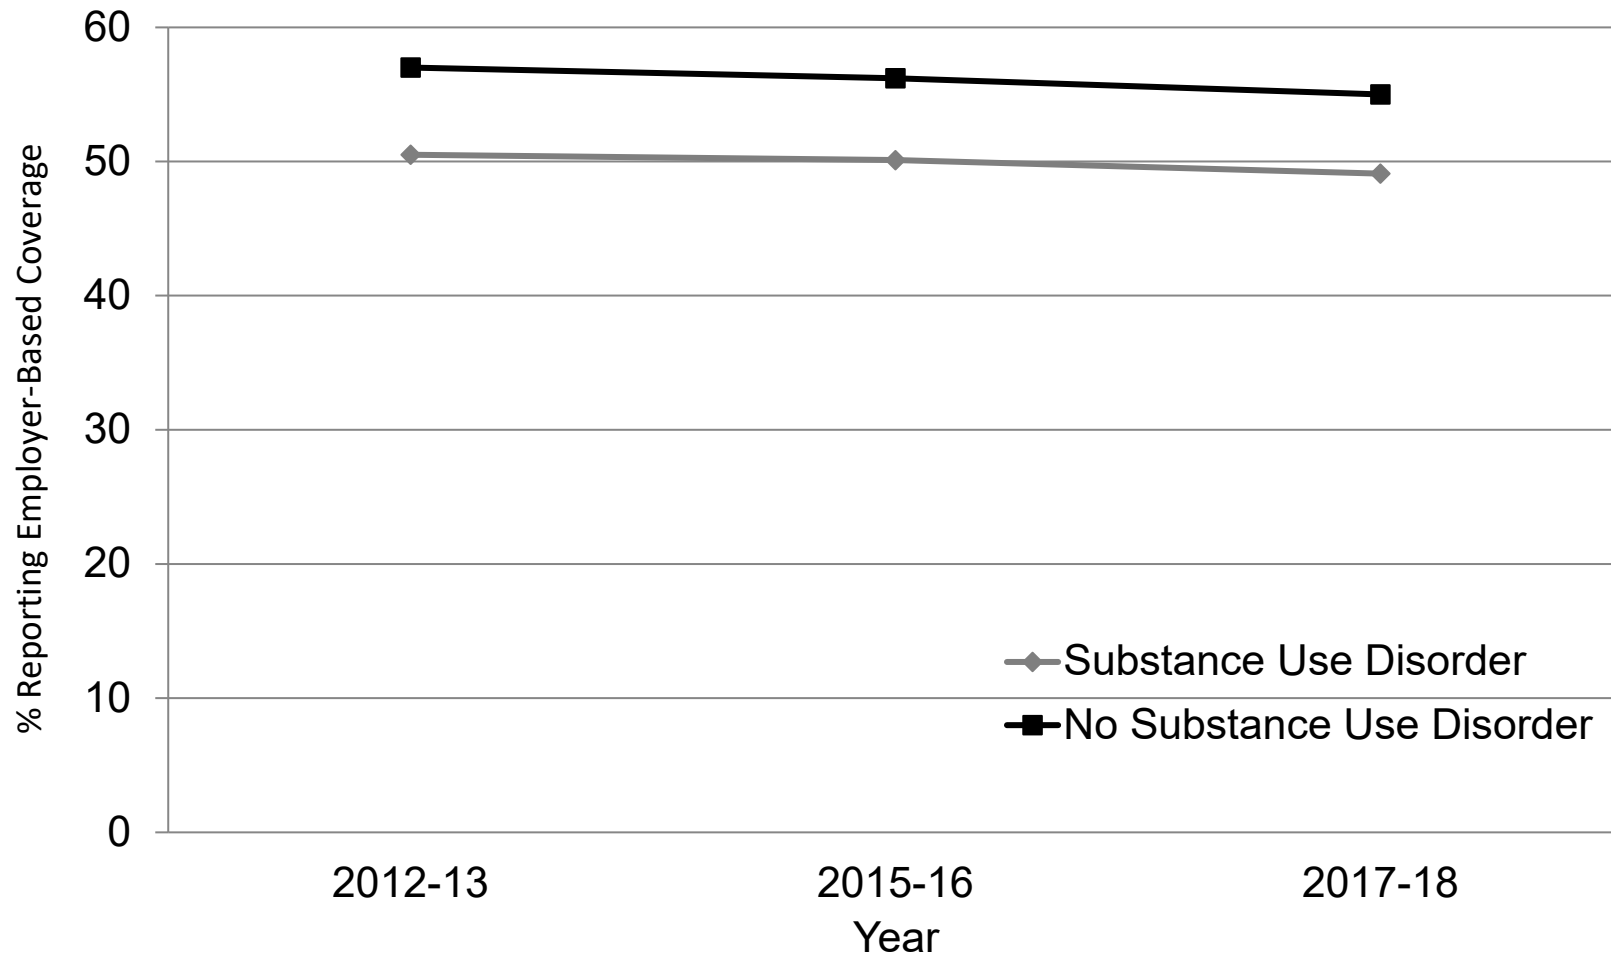

Data from NSDUH. Differences adjusted for age, sex, race/ethnicity, state and education. For ease of presentation, 2015-2016 data are presented as means of modeled estimates from 2012-13/205-16 and 2015-16/2017-18 models.

Appendix Figure 2: Trends in other public coverage among low- and middle-income adults with and without selected substance use disorders, 2012-2018

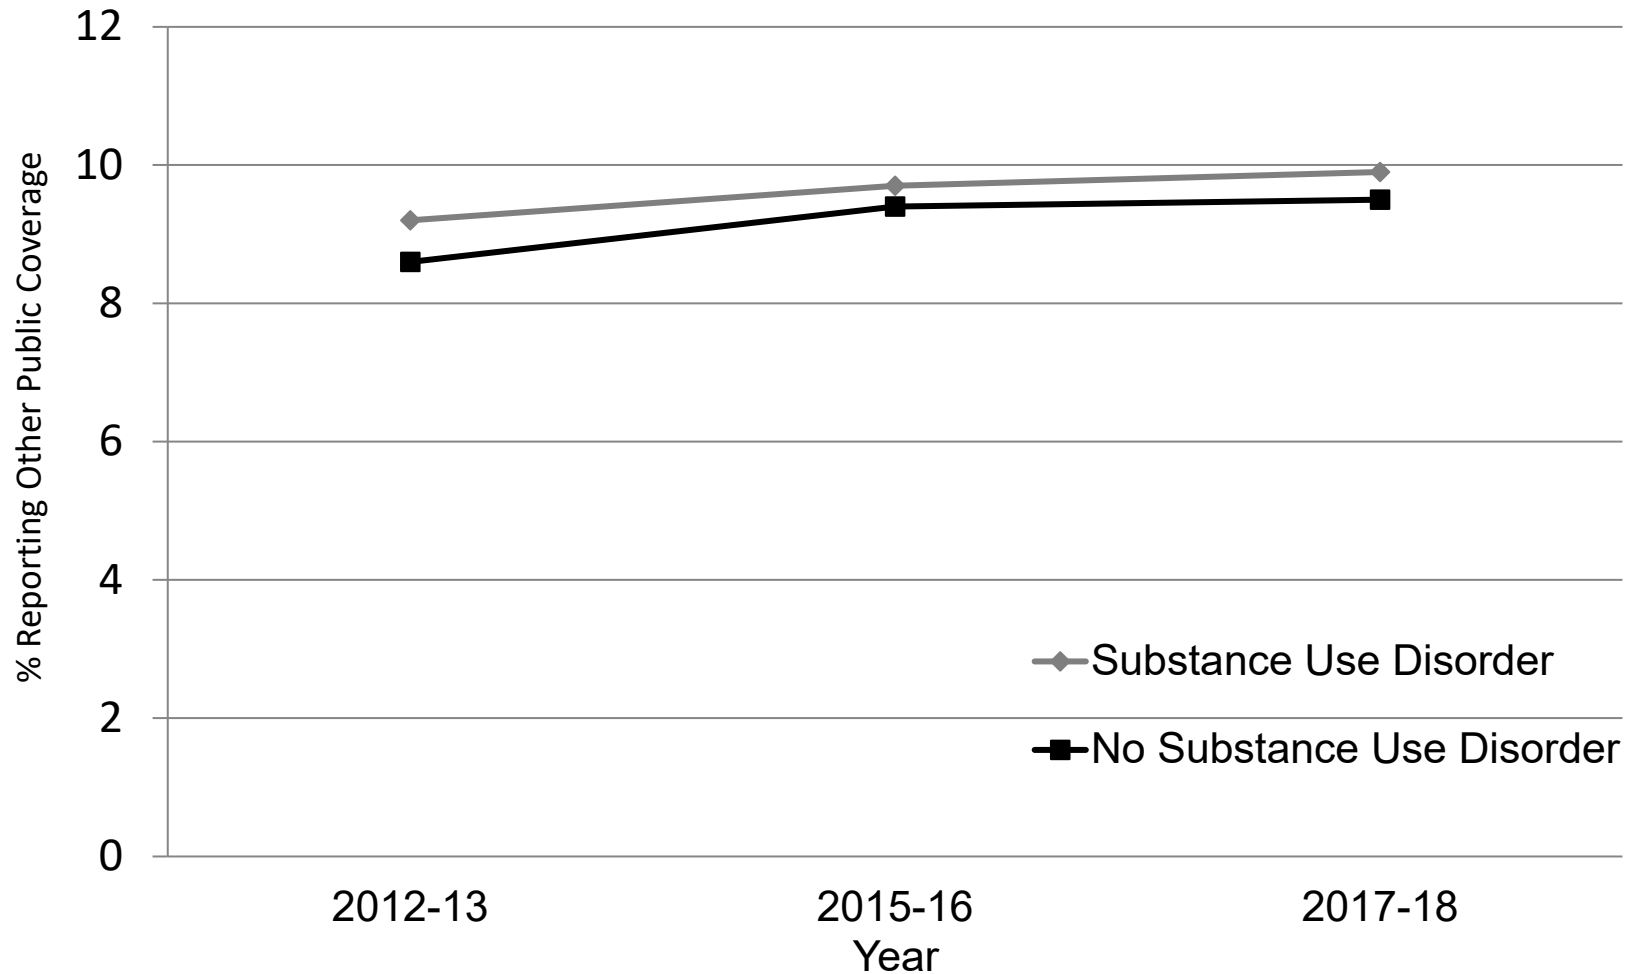

Data from NSDUH. Differences adjusted for age, sex, race/ethnicity, state and education. For ease of presentation, 2015-2016 data are presented as means of modeled estimates from 2012-13/2015-16 and 2015-16/2017-18 models.

Appendix Figure 3: Trends in private individually purchased insurance for low- and middle-income adults with and without selected substance use disorders, 2012-2018

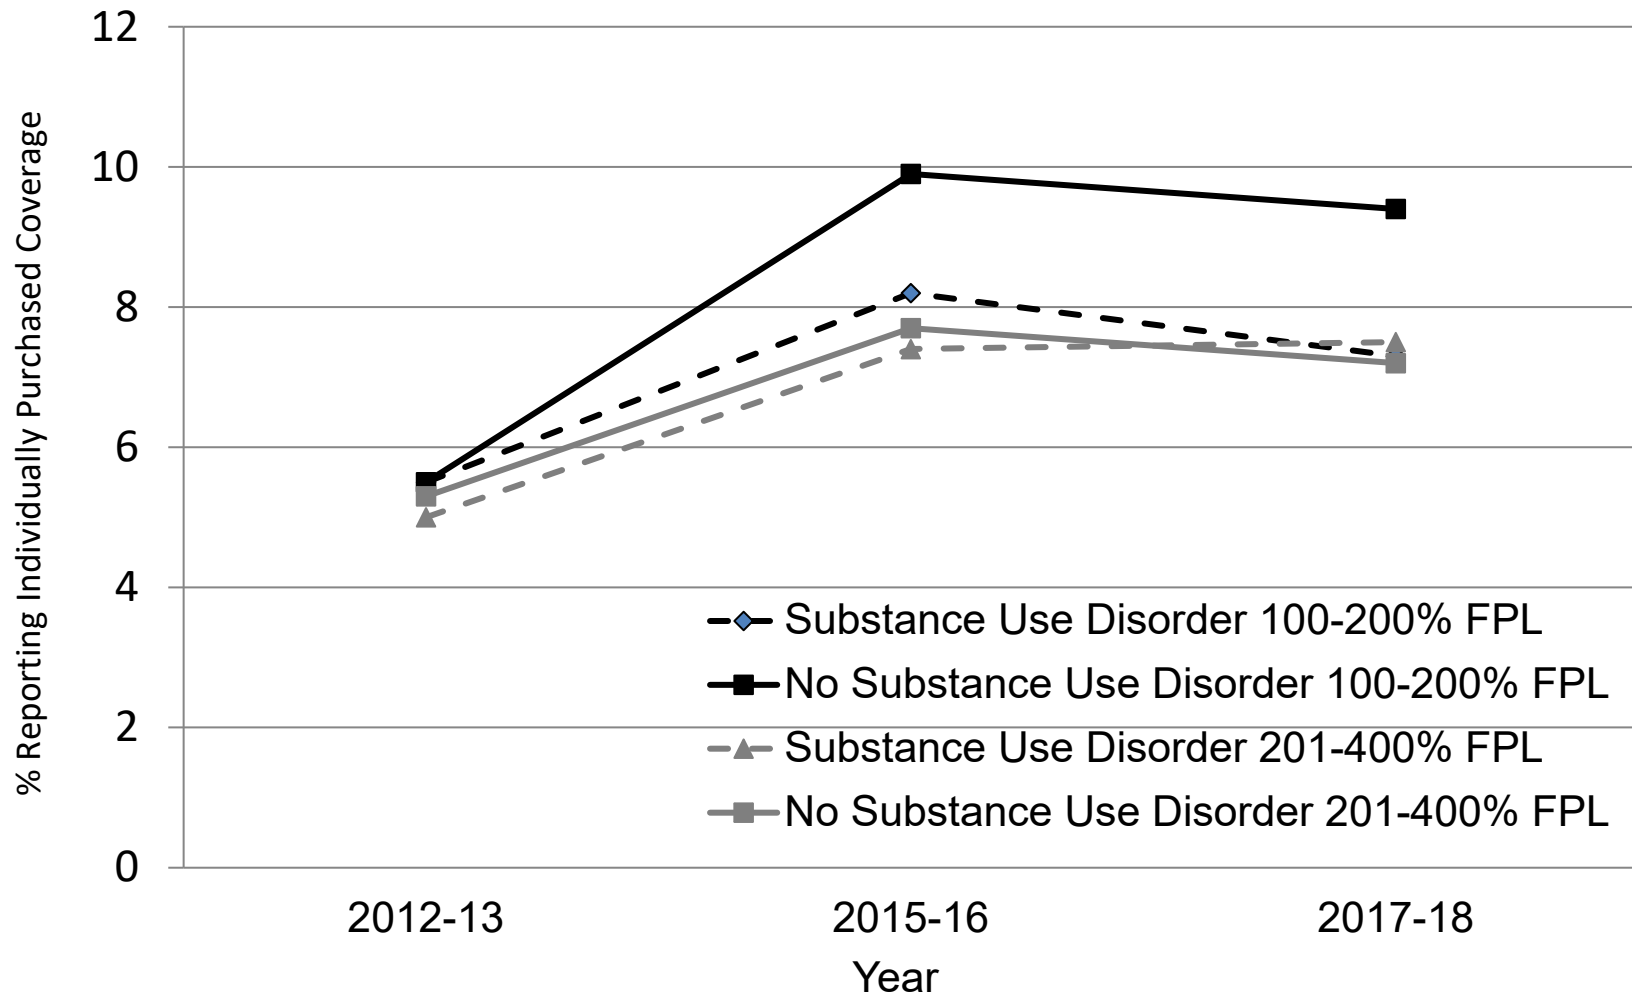

Data from NSDUH. Differences adjusted for age, sex, race/ethnicity, state and education. For ease of presentation, 2015-2016 data are presented as means of modeled estimates from 2012-13/2015-16 and 2015-16/2017-18 models. FPL denotes Federal Poverty Level.

Appendix Figure 4: Trends in Medicaid coverage among low- and middle-income adults in expansion and non-expansion states with and without selected substance use disorders, 2012-2018

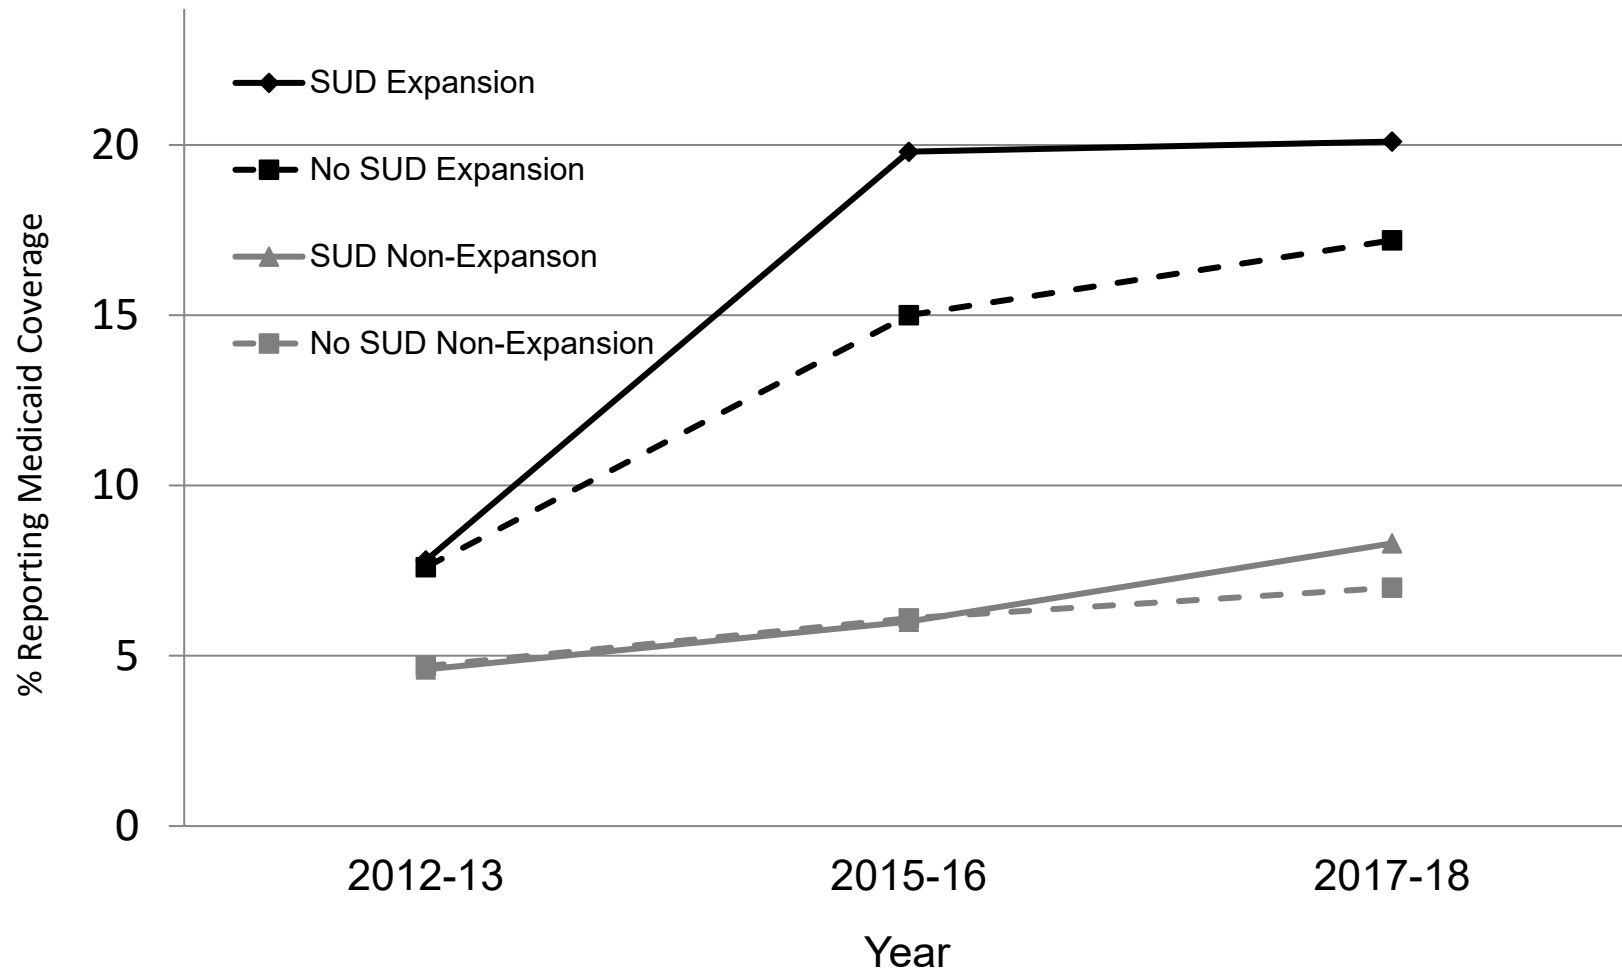

Data from NSDUH. Differences adjusted for age, sex, race/ethnicity, state and education. For ease of presentation, 2015-2016 data are presented as means of modeled estimates from 2012-13/2015-16 and 2015-16/2017-18 models.

Appendix Figure 5: Trends in private individually purchased insurance among low- and middle-income adults in expansion and non-expansion states with and without selected substance use disorders, 2012-2018

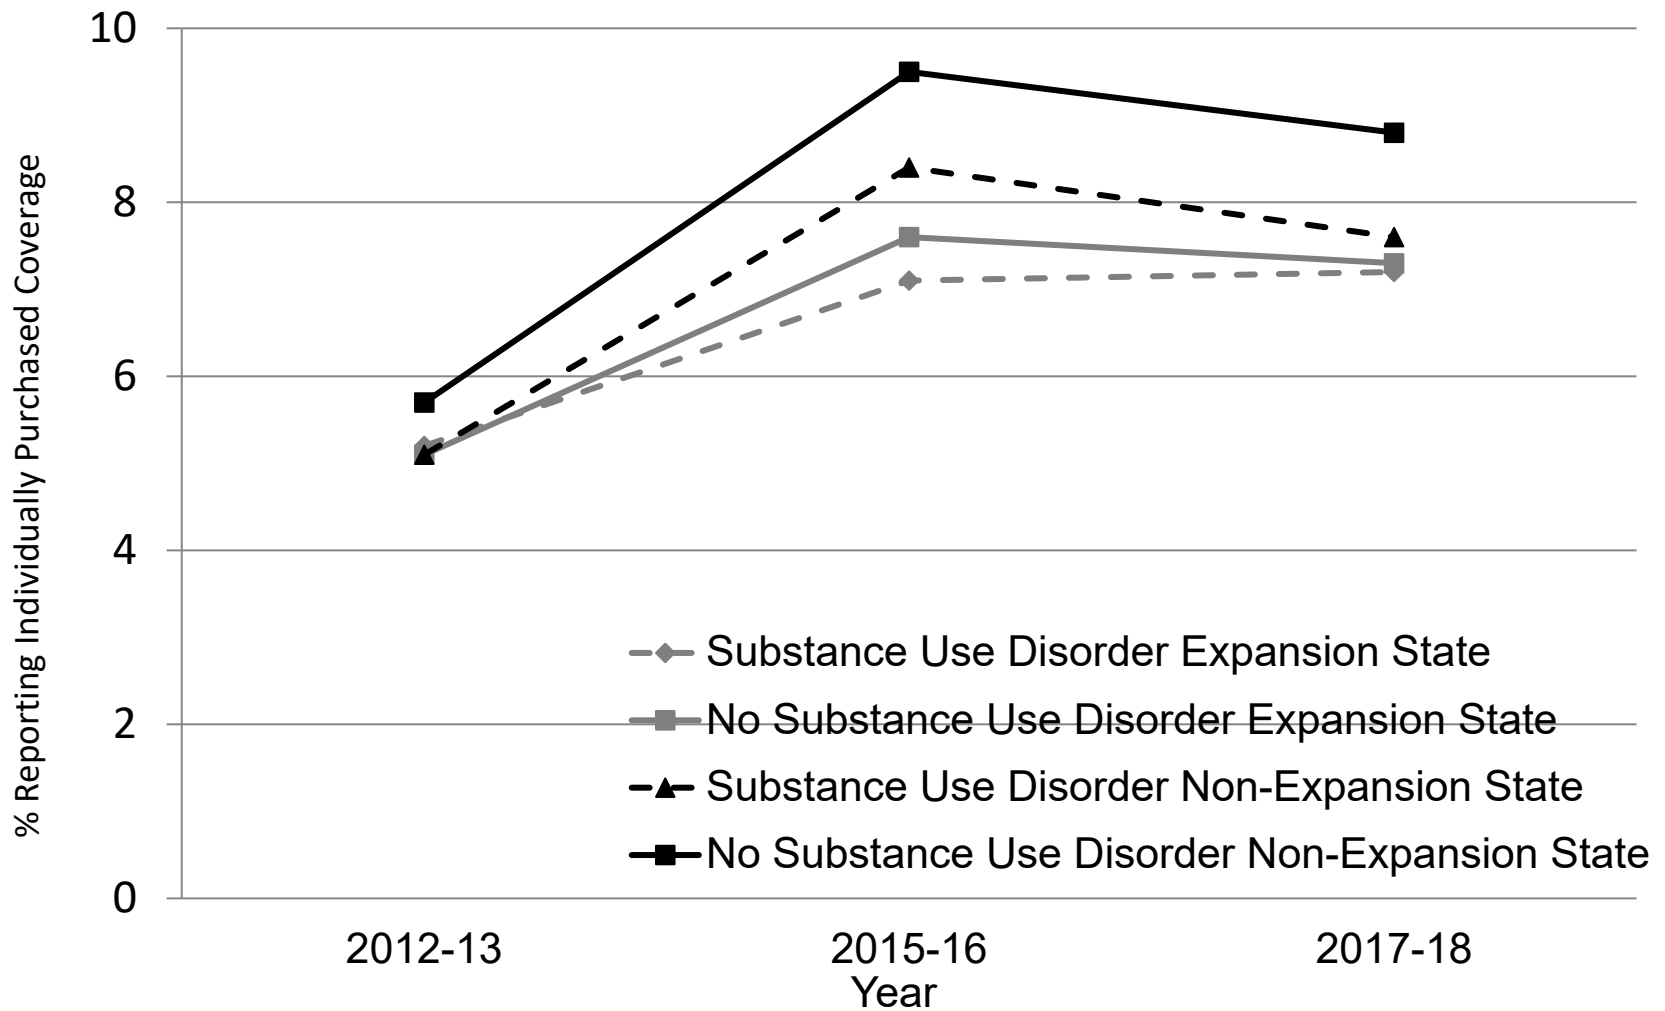

Data from NSDUH. Differences adjusted for age, sex, race/ethnicity, state and education. For ease of presentation, 2015-2016 data are presented as means of modeled estimates from 2012-13/2015-16 and 2015-16/2017-18 models.
